# Supplementary material
Source: publisher figshare collection journal article supplement (https://acs.figshare.com/ndownloader/files/5714862)
Supplement: Supplementary file 1 [file 5714862]

# ic990858t.cif

data_1rac

_audit_creation_method            SHELXL
_chemical_name_systematic
;
rac-(mu!2$-Oxo)-bis[dichloro-(1,5,6-trimethylbenzimidazole)-(pyridine)
-oxo-rhenium(v)]

_chemical_name_common             ?
_chemical_formula_moiety          ?
_chemical_formula_structural      (Bzm)(py)(Cl)2 OReOReO(Bzm)(py)(Cl)2
_chemical_formula_analytical      ? _chemical_formula_sum            
C30 H34 Cl4 N6 O3 Re2 _chemical_formula_weight          1040.83
_chemical_melting_point           ? _chemical_compound_source        
?

loop_
 _atom_type_symbol
 _atom_type_description
 _atom_type_scat_dispersion_real
 _atom_type_scat_dispersion_imag
 _atom_type_scat_source
 'Re'  'Re'  -1.0185   7.2310
 'International Tables Vol C Tables 4.2.6.8 and 6.1.1.4'
 'Cl'  'Cl'   0.1484   0.1585
 'International Tables Vol C Tables 4.2.6.8 and 6.1.1.4'
 'O'  'O'   0.0106   0.0060
 'International Tables Vol C Tables 4.2.6.8 and 6.1.1.4'
 'N'  'N'   0.0061   0.0033
 'International Tables Vol C Tables 4.2.6.8 and 6.1.1.4'
 'C'  'C'   0.0033   0.0016
 'International Tables Vol C Tables 4.2.6.8 and 6.1.1.4'
 'H'  'H'   0.0000   0.0000
 'International Tables Vol C Tables 4.2.6.8 and 6.1.1.4'

_symmetry_cell_setting            orthorhombic
_symmetry_space_group_name_H-M    P bcn (N=B0 60)

loop_
 _symmetry_equiv_pos_as_xyz
 'x, y, z'
 '-x+1/2, -y+1/2, z+1/2'
 '-x, y, -z+1/2'
 'x+1/2, -y+1/2, -z'
 '-x, -y, -z'
 'x-1/2, y-1/2, -z-1/2'
 'x, -y, z-1/2'
 '-x-1/2, y-1/2, z'

_cell_length_a                    14.384(4)
_cell_length_b                    10.265(5)
_cell_length_c                    23.571(5)
_cell_angle_alpha                 90.00
_cell_angle_beta                  90.00
_cell_angle_gamma                 90.00
_cell_volume                      3480.3(21)
_cell_formula_units_Z             4
_cell_measurement_temperature     293(2)
_cell_measurement_reflns_used     25
_cell_measurement_theta_min       11
_cell_measurement_theta_max       18

_exptl_crystal_description        ?
_exptl_crystal_colour             ?
_exptl_crystal_size_max           ?
_exptl_crystal_size_mid           ?
_exptl_crystal_size_min           ?
_exptl_crystal_density_meas       ?
_exptl_crystal_density_diffrn     1.986
_exptl_crystal_density_method     ?
_exptl_crystal_F_000              1992
_exptl_absorpt_coefficient_mu     7.297
_exptl_absorpt_correction_type    psi scan
_exptl_absorpt_correction_T_min   83.7
_exptl_absorpt_correction_T_max   99.9

_exptl_special_details
;
 ?
;

_diffrn_ambient_temperature       293(2)
_diffrn_radiation_wavelength      0.71073
_diffrn_radiation_type            MoK\a
_diffrn_radiation_source          'fine-focus sealed tube'
_diffrn_radiation_monochromator   graphite
_diffrn_measurement_device       '\k-geometry diffractometer'
_diffrn_measurement_device_type  'Enraf Nonius CAD4'
_diffrn_measurement_method       'non-profiled omega scans'
_diffrn_standards_number         3
loop_
_diffrn_standard_refln_index_h
_diffrn_standard_refln_index_k
_diffrn_standard_refln_index_l
   -5    5   -1
   -3   -5   -9
    1    8    4
_diffrn_standards_interval_time   83
_diffrn_standards_decay_%        -1
_diffrn_standards_decay_corr_max 1.039
_diffrn_standards_decay_corr_min 0.976
_diffrn_reflns_number             5056
_diffrn_reflns_av_R_equivalents   0.0000
_diffrn_reflns_av_sigmaI/netI     0.2421
_diffrn_reflns_limit_h_min        0
_diffrn_reflns_limit_h_max        20
_diffrn_reflns_limit_k_min        0
_diffrn_reflns_limit_k_max        14
_diffrn_reflns_limit_l_min        -33
_diffrn_reflns_limit_l_max        0
_diffrn_reflns_theta_min          2.23
_diffrn_reflns_theta_max          29.96
_reflns_number_total              5056
_reflns_number_observed           2090
_reflns_observed_criterion        >2sigma(I)

_computing_data_collection        CAD4  (Enraf-Nonius)
_computing_cell_refinement        CELDIM  (Enraf-Nonius)
_computing_data_reduction         local programs
_computing_structure_solution     SHELXS-86 (Sheldrick, 1990)
_computing_structure_refinement   SHELXL-97 (Sheldrick, 1997)
_computing_molecular_graphics     locally modified version of ORTEP
(Johnson, 1965; Mallinson & Muir, 1985)
_computing_publication_material   ?

_refine_special_details
;
 Refinement on F^2^ for ALL reflections except for 0 with very
 negative F^2^ or flagged by the user for potential systematic errors.
  Weighted R-factors wR and all goodnesses of fit S are based on F^2^,
 conventional R-factors R are based on F, with F set to zero for
 negative F^2^. The observed criterion of F^2^ > 2sigma(F^2^) is used
 only for calculating _R_factor_obs etc. and is not relevant to the
 choice of reflections for refinement.  R-factors based on F^2^ are
 statistically about twice as large as those based on F, and R-
 factors based on ALL data will be even larger.
;

_refine_ls_structure_factor_coef  Fsqd
_refine_ls_matrix_type            full
_refine_ls_weighting_scheme
 'calc w=3D1/[\s^2^(Fo^2^)+(0.0218P)^2^] where P=3D(Fo^2^+2Fc^2^)/3'
_atom_sites_solution_primary      direct
_atom_sites_solution_secondary    difmap
_atom_sites_solution_hydrogens    geom
_refine_ls_hydrogen_treatment     ?
_refine_ls_extinction_method      none
_refine_ls_extinction_coef        ?
_refine_ls_number_reflns          5056
_refine_ls_number_parameters      207
_refine_ls_number_restraints      0
_refine_ls_R_factor_all           0.1816
_refine_ls_R_factor_obs           0.0628
_refine_ls_wR_factor_all          0.0965
_refine_ls_wR_factor_obs          0.0831
_refine_ls_goodness_of_fit_all    0.836
_refine_ls_goodness_of_fit_obs    1.154
_refine_ls_restrained_S_all       0.836
_refine_ls_restrained_S_obs       1.154
_refine_ls_shift/esd_max          0.003
_refine_ls_shift/esd_mean         0.000

loop_
 _atom_site_label
 _atom_site_type_symbol
 _atom_site_fract_x
 _atom_site_fract_y
 _atom_site_fract_z
 _atom_site_U_iso_or_equiv
 _atom_site_thermal_displace_type
 _atom_site_occupancy
 _atom_site_calc_flag
 _atom_site_refinement_flags
 _atom_site_disorder_group
Re Re 0.40833(3) 0.45121(4) 0.19112(2) 0.03213(11) Uani 1 d . .
Cl1 Cl 0.3839(2) 0.6769(2) 0.20561(11) 0.0456(8) Uani 1 d . .
Cl2 Cl 0.2922(2) 0.4045(2) 0.26057(12) 0.0440(7) Uani 1 d . .
O1 O 0.5000 0.4462(8) 0.2500 0.027(2) Uani 1 d S .
O2 O 0.3383(4) 0.4335(7) 0.1351(3) 0.050(2) Uani 1 d . .
N1 N 0.4398(5) 0.2465(7) 0.1840(3) 0.031(2) Uani 1 d . .
N2 N 0.5209(6) 0.5019(8) 0.1375(4) 0.037(2) Uani 1 d . .
N3 N 0.6492(6) 0.6020(9) 0.1136(4) 0.050(3) Uani 1 d . .
C1 C 0.5285(6) 0.2038(8) 0.1858(4) 0.034(2) Uani 1 d . .
H1 H 0.5762(6) 0.2639(8) 0.1906(4) 0.040 Uiso 1 calc R .
C2 C 0.5503(7) 0.0736(8) 0.1805(4) 0.042(3) Uani 1 d . .
H2 H 0.6119(7) 0.0463(8) 0.1821(4) 0.050 Uiso 1 calc R .
C3 C 0.4809(8) -0.0144(10) 0.1730(5) 0.058(3) Uani 1 d . .
H3 H 0.4948(8) -0.1024(10) 0.1693(5) 0.070 Uiso 1 calc R .
C4 C 0.3911(7) 0.0267(9) 0.1710(4) 0.049(3) Uani 1 d . .
H4 H 0.3428(7) -0.0323(9) 0.1656(4) 0.059 Uiso 1 calc R .
C5 C 0.3733(7) 0.1587(10) 0.1771(4) 0.041(3) Uani 1 d . .
H5 H 0.3119(7) 0.1868(10) 0.1764(4) 0.049 Uiso 1 calc R .
C6 C 0.5819(8) 0.5901(9) 0.1521(4) 0.046(3) Uani 1 d . .
H6 H 0.5787(8) 0.6387(9) 0.1853(4) 0.055 Uiso 1 calc R .
C7 C 0.6375(8) 0.5067(10) 0.0726(4) 0.044(3) Uani 1 d . .
C8 C 0.5526(8) 0.4484(14) 0.0885(5) 0.055(3) Uani 1 d . .
C9 C 0.5201(10) 0.3424(12) 0.0544(5) 0.071(4) Uani 1 d . .
H9 H 0.4644(10) 0.3012(12) 0.0635(5) 0.085 Uiso 1 calc R .
C10 C 0.5721(12) 0.2999(13) 0.0070(5) 0.079(5) Uani 1 d . .
C11 C 0.6588(12) 0.3616(15) -0.0069(6) 0.075(4) Uani 1 d . .
C12 C 0.6877(9) 0.4656(15) 0.0252(6) 0.075(4) Uani 1 d . .
H12 H 0.7418(9) 0.5096(15) 0.0152(6) 0.090 Uiso 1 calc R .
C13 C 0.7279(9) 0.6915(13) 0.1154(6) 0.090(5) Uani 1 d . .
H13A H 0.7243(35) 0.7504(57) 0.0839(22) 0.135 Uiso 1 calc R .
H13B H 0.7848(9) 0.6429(14) 0.1133(38) 0.135 Uiso 1 calc R .
H13C H 0.7263(36) 0.7400(63) 0.1502(18) 0.135 Uiso 1 calc R .
C14 C 0.5382(13) 0.1925(12) -0.0289(5) 0.119(7) Uani 1 d . .
H14A H 0.5741(53) 0.1156(33) -0.0214(36) 0.178 Uiso 1 calc R .
H14B H 0.5445(76) 0.2161(47) -0.0681(5) 0.178 Uiso 1 calc R .
H14C H 0.4740(25) 0.1759(74) -0.0205(35) 0.178 Uiso 1 calc R .
C15 C 0.7210(13) 0.3128(14) -0.0534(5) 0.131(8) Uani 1 d . .
H15A H 0.7050(64) 0.3549(99) -0.0884(13) 0.196 Uiso 1 calc R .
H15B H 0.7134(67) 0.2203(26) -0.0574(38) 0.196 Uiso 1 calc R .
H15C H 0.7846(16) 0.3318(113) -0.0440(27) 0.196 Uiso 1 calc R .

loop_
 _atom_site_aniso_label
 _atom_site_aniso_U_11
 _atom_site_aniso_U_22
 _atom_site_aniso_U_33
 _atom_site_aniso_U_23
 _atom_site_aniso_U_13
 _atom_site_aniso_U_12
Re 0.0269(2) 0.0287(2) 0.0408(2) 0.0035(3) -0.0010(3) 0.0011(2)
Cl1 0.045(2) 0.0283(12) 0.064(2) 0.0063(12) 0.0003(13) 0.0089(11) Cl2
0.0281(12) 0.047(2) 0.057(2) 0.0051(13) 0.0080(12) -0.0005(12) O1
0.020(4) 0.017(4) 0.043(5) 0.000 0.004(4) 0.000 O2 0.040(4) 0.050(5)
0.061(5) 0.005(4) -0.014(4) 0.006(4) N1 0.030(4) 0.024(4) 0.040(5)
0.011(4) -0.005(4) -0.011(3) N2 0.038(5) 0.028(4) 0.044(6) -0.001(4)
0.004(4) -0.005(4) N3 0.047(5) 0.059(7) 0.044(6) 0.017(5) -0.001(5)
-0.010(5) C1 0.038(5) 0.027(4) 0.036(6) -0.007(5) -0.004(5) 0.004(4)
C2 0.034(5) 0.029(6) 0.063(8) -0.002(5) 0.006(5) 0.006(4) C3 0.070(8)
0.029(6) 0.075(9) -0.017(5) 0.014(7) -0.006(6) C4 0.052(7) 0.034(6)
0.061(7) -0.008(5) 0.011(5) -0.018(5) C5 0.033(5) 0.039(6) 0.050(8)
0.005(5) -0.001(5) 0.000(5) C6 0.053(7) 0.042(6) 0.042(6) 0.009(5)
0.024(6) 0.012(6) C7 0.054(6) 0.054(7) 0.023(7) 0.001(6) 0.004(5)
0.016(6) C8 0.050(6) 0.071(8) 0.043(7) -0.007(8) -0.001(6) -0.004(8)
C9 0.087(10) 0.070(9) 0.055(8) -0.007(7) -0.017(8) -0.002(8) C10
0.121(14) 0.075(9) 0.040(7) -0.013(7) 0.002(8) 0.052(10) C11 0.093(12)
0.072(10) 0.060(10) 0.015(9) 0.007(9) 0.020(9) C12 0.065(9) 0.089(11)
0.072(10) 0.055(9) 0.014(7) 0.011(9) C13 0.070(11) 0.097(11) 0.104(11)
0.018(10) 0.017(9) -0.013(9) C14 0.232(23) 0.066(10) 0.059(9)
-0.017(8) -0.005(12) 0.003(12) C15 0.209(21) 0.123(13) 0.061(9)
0.023(10) 0.069(12) 0.100(14)

_geom_special_details
;
 All esds (except the esd in the dihedral angle between two l.s.
 planes) are estimated using the full covariance matrix.  The cell
 esds are taken into account individually in the estimation of esds in
 distances, angles and torsion angles; correlations between esds in
 cell parameters are only used when they are defined by crystal
 symmetry.  An approximate (isotropic) treatment of cell esds is used
 for estimating esds involving l.s. planes.
;

loop_
 _geom_bond_atom_site_label_1
 _geom_bond_atom_site_label_2
 _geom_bond_distance
 _geom_bond_site_symmetry_2
 _geom_bond_publ_flag
Re O2 1.671(7) . ?
Re O1 1.9150(5) . ?
Re N2 2.120(8) . ?
Re N1 2.156(7) . ?
Re Cl1 2.368(3) . ?
Re Cl2 2.387(3) . ?
O1 Re 1.9150(6) 3_655 ?
N1 C5 1.324(11) . ?
N1 C1 1.351(10) . ?
N2 C6 1.307(12) . ?
N2 C8 1.357(13) . ?
N3 C6 1.331(12) . ?
N3 C7 1.386(12) . ?
N3 C13 1.459(14) . ?
C1 C2 1.379(11) . ?
C2 C3 1.357(13) . ?
C3 C4 1.360(14) . ?
C4 C5 1.386(13) . ?
C7 C12 1.39(2) . ?
C7 C8 1.411(14) . ?
C8 C9 1.43(2) . ?
C9 C10 1.42(2) . ?
C10 C11 1.44(2) . ?
C10 C14 1.47(2) . ?
C11 C12 1.37(2) . ?
C11 C15 1.50(2) . ?

loop_
 _geom_angle_atom_site_label_1
 _geom_angle_atom_site_label_2
 _geom_angle_atom_site_label_3
 _geom_angle
 _geom_angle_site_symmetry_1
 _geom_angle_site_symmetry_3
 _geom_angle_publ_flag
O2 Re O1 170.0(3) . . ?
O2 Re N2 90.9(3) . . ?
O1 Re N2 85.0(2) . . ?
O2 Re N1 87.6(3) . . ?
O1 Re N1 83.5(3) . . ?
N2 Re N1 91.9(3) . . ?
O2 Re Cl1 97.5(3) . . ?
O1 Re Cl1 91.4(3) . . ?
N2 Re Cl1 87.7(2) . . ?
N1 Re Cl1 174.8(2) . . ?
O2 Re Cl2 95.7(2) . . ?
O1 Re Cl2 88.82(8) . . ?
N2 Re Cl2 173.2(2) . . ?
N1 Re Cl2 90.3(2) . . ?
Cl1 Re Cl2 89.65(9) . . ?
Re O1 Re 176.9(5) 3_655 . ?
C5 N1 C1 117.7(8) . . ?
C5 N1 Re 121.5(6) . . ?
C1 N1 Re 120.8(6) . . ?
C6 N2 C8 106.2(9) . . ?
C6 N2 Re 121.7(7) . . ?
C8 N2 Re 131.6(8) . . ?
C6 N3 C7 108.8(9) . . ?
C6 N3 C13 127.0(11) . . ?
C7 N3 C13 123.9(10) . . ?
N1 C1 C2 121.8(9) . . ?
C3 C2 C1 119.3(9) . . ?
C2 C3 C4 119.8(9) . . ?
C3 C4 C5 118.3(9) . . ?
N1 C5 C4 123.1(9) . . ?
N2 C6 N3 111.9(9) . . ?
N3 C7 C12 135.2(13) . . ?
N3 C7 C8 102.6(9) . . ?
C12 C7 C8 122.2(12) . . ?
N2 C8 C7 110.2(10) . . ?
N2 C8 C9 132.5(12) . . ?
C7 C8 C9 117.1(11) . . ?
C10 C9 C8 120.4(13) . . ?
C9 C10 C11 120.2(14) . . ?
C9 C10 C14 120.7(16) . . ?
C11 C10 C14 119.1(13) . . ?
C12 C11 C10 118.6(13) . . ?
C12 C11 C15 118.8(16) . . ?
C10 C11 C15 122.5(15) . . ?
C11 C12 C7 121.4(13) . . ?

loop_
 _geom_torsion_atom_site_label_1
 _geom_torsion_atom_site_label_2
 _geom_torsion_atom_site_label_3
 _geom_torsion_atom_site_label_4
 _geom_torsion
 _geom_torsion_site_symmetry_1
 _geom_torsion_site_symmetry_2
 _geom_torsion_site_symmetry_3
 _geom_torsion_site_symmetry_4
 _geom_torsion_publ_flag
 N1 Re Re N1 -23.8(4) . . 3_655 3_655 ?
 N2 Re Re N2 151.4(4) . . 3_655 3_655 ?
 Cl1 Re Re Cl1 -23.89(12) . . 3_655 3_655 ?
 Cl2 Re Re Cl2 156.81(12) . . 3_655 3_655 ?

_refine_diff_density_max    1.038
_refine_diff_density_min   -1.319
_refine_diff_density_rms    0.226


data_2meso

_audit_creation_method            SHELXL
_chemical_name_systematic
;
meso-(mu!2$-Oxo)-bis[dichloro-(1,5,6-trimethylbenzimidazole)-(3,5-luti
dine)-oxo-rhenium(v)] acetone solvate ; _chemical_name_common         
   ? _chemical_formula_moiety          (C34 H39 Cl4 N6 O3 Re2) (C1.5
H6 O0.50) _chemical_formula_structural     
(Bzm)(lutidine)(Cl)2OReOReO(Bzm)(lutidine)(Cl)2. 0.5[(CH3)2CO]
_chemical_formula_analytical      ? _chemical_formula_sum            
C35.50 H45 Cl4 N6 O3.50 Re2 _chemical_formula_weight          1125.97
_chemical_melting_point           ? _chemical_compound_source        
?

loop_
 _atom_type_symbol
 _atom_type_description
 _atom_type_scat_dispersion_real
 _atom_type_scat_dispersion_imag
 _atom_type_scat_source
 'Re'  'Re'  -1.0185   7.2310
 'International Tables Vol C Tables 4.2.6.8 and 6.1.1.4'
 'Cl'  'Cl'   0.1484   0.1585
 'International Tables Vol C Tables 4.2.6.8 and 6.1.1.4'
 'O'  'O'   0.0106   0.0060
 'International Tables Vol C Tables 4.2.6.8 and 6.1.1.4'
 'N'  'N'   0.0061   0.0033
 'International Tables Vol C Tables 4.2.6.8 and 6.1.1.4'
 'C'  'C'   0.0033   0.0016
 'International Tables Vol C Tables 4.2.6.8 and 6.1.1.4'
 'H'  'H'   0.0000   0.0000
 'International Tables Vol C Tables 4.2.6.8 and 6.1.1.4'

_symmetry_cell_setting            orthorhombic
_symmetry_space_group_name_H-M    P bca (N=B0 61)

loop_
 _symmetry_equiv_pos_as_xyz
 'x, y, z'
 '-x+1/2, -y, z+1/2'
 '-x, y+1/2, -z+1/2'
 'x+1/2, -y+1/2, -z'
 '-x, -y, -z'
 'x-1/2, y, -z-1/2'
 'x, -y-1/2, z-1/2'
 '-x-1/2, y-1/2, z'

_cell_length_a                    17.113(3)
_cell_length_b                    20.744(4)
_cell_length_c                    23.302(6)
_cell_angle_alpha                 90.00
_cell_angle_beta                  90.00
_cell_angle_gamma                 90.00
_cell_volume                      8272.0(30)
_cell_formula_units_Z             8
_cell_measurement_temperature     100(2)
_cell_measurement_reflns_used     ?
_cell_measurement_theta_min       ?
_cell_measurement_theta_max       ?

_exptl_crystal_description        ?
_exptl_crystal_colour             green
_exptl_crystal_size_max           ?
_exptl_crystal_size_mid           ?
_exptl_crystal_size_min           ?
_exptl_crystal_density_meas       ?
_exptl_crystal_density_diffrn     1.808
_exptl_crystal_density_method     ?
_exptl_crystal_F_000              4368
_exptl_absorpt_coefficient_mu     6.149
_exptl_absorpt_correction_type    ?
_exptl_absorpt_correction_T_min   ?
_exptl_absorpt_correction_T_max   ?

_exptl_special_details
;
 ?
;

_diffrn_ambient_temperature       100(2)
_diffrn_radiation_wavelength      0.80000
_diffrn_radiation_type               synchrotron 
_diffrn_radiation_source          
_diffrn_radiation_monochromator   Si 110
_diffrn_measurement_device        345mm Imaging plate  
_diffrn_measurement_method        ?
_diffrn_standards_number          ?
_diffrn_standards_interval_count  ?
_diffrn_standards_interval_time   ?
_diffrn_standards_decay_%         ?
_diffrn_reflns_number             21265
_diffrn_reflns_av_R_equivalents   0.063
_diffrn_reflns_av_sigmaI/netI     0.0375
_diffrn_reflns_limit_h_min        0
_diffrn_reflns_limit_h_max        18
_diffrn_reflns_limit_k_min        0
_diffrn_reflns_limit_k_max        23
_diffrn_reflns_limit_l_min        0
_diffrn_reflns_limit_l_max        27
_diffrn_reflns_theta_min          2.00
_diffrn_reflns_theta_max          28.06
_reflns_number_total              6452
_reflns_number_observed           5694
_reflns_observed_criterion        >2sigma(I)

_computing_data_collection        ?
_computing_cell_refinement            Denzo
_computing_data_reduction             Denzo
_computing_structure_solution     'SHELXS-86 (Sheldrick, 1990)'
_computing_structure_refinement   'SHELXL-93 (Sheldrick, 1993)'
_computing_molecular_graphics     ?
_computing_publication_material   ?

_refine_special_details
;
 Refinement on F^2^ for ALL reflections except for 0 with very
 negative F^2^ or flagged by the user for potential systematic errors.
  Weighted R-factors wR and all goodnesses of fit S are based on F^2^,
 conventional R-factors R are based on F, with F set to zero for
 negative F^2^. The observed criterion of F^2^ > 2sigma(F^2^) is used
 only for calculating _R_factor_obs etc. and is not relevant to the
 choice of reflections for refinement.  R-factors based on F^2^ are
 statistically about twice as large as those based on F, and R-
 factors based on ALL data will be even larger.
;

_refine_ls_structure_factor_coef  Fsqd
_refine_ls_matrix_type            full
_refine_ls_weighting_scheme
 'calc w=3D1/[\s^2^(Fo^2^)+(0.0614P)^2^+114.8508P] where
 P=3D(Fo^2^+2Fc^2^)/3'
_atom_sites_solution_primary      direct
_atom_sites_solution_secondary    difmap
_atom_sites_solution_hydrogens    geom
_refine_ls_hydrogen_treatment     ?
_refine_ls_extinction_method      none
_refine_ls_extinction_coef        ?
_refine_ls_number_reflns          6452
_refine_ls_number_parameters      468
_refine_ls_number_restraints      3
_refine_ls_R_factor_all           0.0582
_refine_ls_R_factor_obs           0.0522
_refine_ls_wR_factor_all          0.1385
_refine_ls_wR_factor_obs          0.1354
_refine_ls_goodness_of_fit_all    1.097
_refine_ls_goodness_of_fit_obs    1.146
_refine_ls_restrained_S_all       1.097
_refine_ls_restrained_S_obs       1.147
_refine_ls_shift/esd_max          0.024
_refine_ls_shift/esd_mean         0.001

loop_
 _atom_site_label
 _atom_site_type_symbol
 _atom_site_fract_x
 _atom_site_fract_y
 _atom_site_fract_z
 _atom_site_U_iso_or_equiv
 _atom_site_thermal_displace_type
 _atom_site_occupancy
 _atom_site_calc_flag
 _atom_site_refinement_flags
 _atom_site_disorder_group
Re Re 0.34060(2) 0.07838(2) 0.15448(2) 0.03181(15) Uani 1 d . .
ReA Re 0.21876(2) 0.17975(2) 0.05104(2) 0.02807(14) Uani 1 d . .
Cl1 Cl 0.3649(2) 0.17071(11) 0.21211(11) 0.0368(6) Uani 1 d . .
Cl2 Cl 0.45739(15) 0.09857(12) 0.10043(12) 0.0382(6) Uani 1 d . . Cl2A
Cl 0.19470(15) 0.25518(11) 0.12514(11) 0.0336(5) Uani 1 d . . Cl1A Cl
0.10795(14) 0.11977(11) 0.08136(11) 0.0332(5) Uani 1 d . . O1 O
0.2837(4) 0.1288(3) 0.1009(3) 0.034(2) Uani 1 d . . O2 O 0.3821(5)
0.0234(3) 0.1971(3) 0.046(2) Uani 1 d . . O2A O 0.1754(4) 0.2208(3)
-0.0025(3) 0.0317(15) Uani 1 d . . N1 N 0.3154(5) -0.0015(4) 0.0977(4)
0.034(2) Uani 1 d . . N2 N 0.2337(5) 0.0685(4) 0.1978(4) 0.035(2) Uani
1 d . . N3 N 0.1239(6) 0.1011(4) 0.2374(4) 0.041(2) Uani 1 d . . N1A N
0.3259(5) 0.2270(4) 0.0302(4) 0.032(2) Uani 1 d . . N2A N 0.2503(6)
0.1075(4) -0.0097(4) 0.037(2) Uani 1 d . . N3A N 0.3259(5) 0.0406(4)
-0.0563(4) 0.038(2) Uani 1 d . . C1 C 0.2455(7) -0.0116(4) 0.0743(4)
0.034(2) Uani 1 d . . H1 H 0.2045(7) 0.0183(4) 0.0813(4) 0.041 Uiso 1
calc R . C2 C 0.2318(7) -0.0641(5) 0.0405(5) 0.042(3) Uani 1 d . . C3
C 0.2921(8) -0.1067(5) 0.0289(5) 0.046(3) Uani 1 d . . H3 H 0.2834(8)
-0.1427(5) 0.0046(5) 0.055 Uiso 1 calc R . C4 C 0.3648(7) -0.0967(5)
0.0528(5) 0.038(3) Uani 1 d . . C5 C 0.3744(7) -0.0436(5) 0.0863(5)
0.039(3) Uani 1 d . . H5 H 0.4245(7) -0.0356(5) 0.1024(5) 0.046 Uiso 1
calc R . C6 C 0.1875(6) 0.1181(6) 0.2107(5) 0.041(3) Uani 1 d . . H6 H
0.1997(6) 0.1615(6) 0.2013(5) 0.049 Uiso 1 calc R . C7 C 0.1244(7)
0.0360(5) 0.2422(5) 0.044(3) Uani 1 d . . C8 C 0.1919(7) 0.0146(5)
0.2174(5) 0.037(2) Uani 1 d . . C9 C 0.2066(10) -0.0505(6) 0.2130(6)
0.066(4) Uani 1 d . . H9 H 0.2536(10) -0.0660(6) 0.1962(6) 0.079 Uiso
1 calc R . C10 C 0.1505(10) -0.0927(6) 0.2339(7) 0.072(5) Uani 1 d . .
C11 C 0.0842(9) -0.0694(6) 0.2614(7) 0.065(4) Uani 1 d . . C12 C
0.0693(8) -0.0055(6) 0.2658(5) 0.056(3) Uani 1 d . . H12 H 0.0235(8)
0.0102(6) 0.2841(5) 0.067 Uiso 1 calc R . C13 C 0.0594(8) 0.1447(7)
0.2531(5) 0.057(3) Uani 1 d . . H13A H 0.0454(37) 0.1379(32)
0.2934(12) 0.085 Uiso 1 calc R . H13B H 0.0140(19) 0.1357(30)
0.2287(27) 0.085 Uiso 1 calc R . H13C H 0.0760(19) 0.1895(7)
0.2475(37) 0.085 Uiso 1 calc R . C14 C 0.1577(10) -0.1630(7) 0.2234(8)
0.078(5) Uani 1 d . . H14A H 0.1117(36) -0.1783(13) 0.2023(49) 0.118
Uiso 1 calc R . H14B H 0.1613(77) -0.1857(9) 0.2602(8) 0.118 Uiso 1
calc R . H14C H 0.2049(40) -0.1714(9) 0.2008(48) 0.118 Uiso 1 calc R .
C15 C 0.0231(12) -0.1169(8) 0.2861(9) 0.108(8) Uani 1 d . . H15A H
0.0476(26) -0.1437(51) 0.3157(48) 0.161 Uiso 1 calc R . H15B H
0.0031(70) -0.1444(53) 0.2552(15) 0.161 Uiso 1 calc R . H15C H
-0.0202(45) -0.0925(8) 0.3031(62) 0.161 Uiso 1 calc R . C16 C
0.1527(8) -0.0762(6) 0.0168(6) 0.052(3) Uani 1 d . . H16A H 0.1263(20)
-0.1091(30) 0.0400(23) 0.078 Uiso 1 calc R . H16B H 0.1573(8)
-0.0914(40) -0.0229(14) 0.078 Uiso 1 calc R . H16C H 0.1223(18)
-0.0362(11) 0.0176(34) 0.078 Uiso 1 calc R . C17 C 0.4318(8)
-0.1414(5) 0.0413(6) 0.050(3) Uani 1 d . . H17A H 0.4158(17)
-0.1858(7) 0.0494(35) 0.075 Uiso 1 calc R . H17B H 0.4760(18)
-0.1297(26) 0.0659(26) 0.075 Uiso 1 calc R . H17C H 0.4473(33)
-0.1378(30) 0.0009(10) 0.075 Uiso 1 calc R . C1A C 0.3457(6) 0.2392(4)
-0.0242(4) 0.033(2) Uani 1 d . . H1A H 0.3086(6) 0.2301(4) -0.0535(4)
0.040 Uiso 1 calc R . C2A C 0.4165(6) 0.2641(4) -0.0401(4) 0.033(2)
Uani 1 d . . C3A C 0.4702(6) 0.2767(5) 0.0022(5) 0.036(2) Uani 1 d . .
H3A H 0.5202(6) 0.2933(5) -0.0075(5) 0.044 Uiso 1 calc R . C4A C
0.4513(6) 0.2651(4) 0.0591(4) 0.032(2) Uani 1 d . . C5A C 0.3777(6)
0.2411(5) 0.0714(4) 0.032(2) Uani 1 d . . H5A H 0.3635(6) 0.2344(5)
0.1103(4) 0.038 Uiso 1 calc R . C6A C 0.3226(7) 0.0863(5) -0.0163(5)
0.039(3) Uani 1 d . . C7A C 0.2522(7) 0.0331(5) -0.0780(5) 0.040(3)
Uani 1 d . . C8A C 0.2039(6) 0.0752(5) -0.0483(4) 0.032(2) Uani 1 d .
. C9A C 0.1263(8) 0.0784(5) -0.0599(4) 0.044(3) Uani 1 d . . H9A H
0.0936(8) 0.1084(5) -0.0405(4) 0.052 Uiso 1 calc R . C10A C 0.0957(8)
0.0366(5) -0.1012(5) 0.045(3) Uani 1 d . . C11A C 0.1442(8) -0.0071(6)
-0.1297(5) 0.049(3) Uani 1 d . . C12A C 0.2231(9) -0.0101(6)
-0.1196(5) 0.052(3) Uani 1 d . . H12A H 0.2561(9) -0.0395(6)
-0.1393(5) 0.062 Uiso 1 calc R . C13A C 0.3967(8) 0.0048(6) -0.0731(6)
0.052(3) Uani 1 d . . H13D H 0.4123(30) 0.0174(31) -0.1120(15) 0.079
Uiso 1 calc R . H13E H 0.3859(16) -0.0416(6) -0.0722(36) 0.079 Uiso 1
calc R . H13F H 0.4392(16) 0.0147(32) -0.0462(22) 0.079 Uiso 1 calc R
. C14A C 0.0091(8) 0.0389(6) -0.1141(6) 0.056(3) Uani 1 d . . H14D H
-0.0159(12) -0.0002(21) -0.0994(35) 0.085 Uiso 1 calc R . H14E H
0.0012(8) 0.0416(44) -0.1557(6) 0.085 Uiso 1 calc R . H14F H
-0.0140(13) 0.0768(25) -0.0956(33) 0.085 Uiso 1 calc R . C15A C
0.1076(11) -0.0550(7) -0.1715(6) 0.074(5) Uani 1 d . . H15D H
0.0831(62) -0.0315(7) -0.2033(27) 0.112 Uiso 1 calc R . H15E H
0.0680(48) -0.0807(40) -0.1515(14) 0.112 Uiso 1 calc R . H15F H
0.1482(15) -0.0836(37) -0.1867(38) 0.112 Uiso 1 calc R . C16A C
0.4359(7) 0.2756(6) -0.1030(5) 0.048(3) Uani 1 d . . H16D H 0.4781(35)
0.2465(30) -0.1147(11) 0.072 Uiso 1 calc R . H16E H 0.4526(51)
0.3204(13) -0.1082(8) 0.072 Uiso 1 calc R . H16F H 0.3894(15)
0.2673(41) -0.1264(6) 0.072 Uiso 1 calc R . C17A C 0.5082(7) 0.2748(6)
0.1068(5) 0.045(3) Uani 1 d . . H17D H 0.5605(10) 0.2817(39) 0.0908(5)
0.067 Uiso 1 calc R . H17E H 0.5087(36) 0.2365(17) 0.1315(21) 0.067
Uiso 1 calc R . H17F H 0.4928(27) 0.3125(24) 0.1294(21) 0.067 Uiso 1
calc R . C18 C 0.2789(17) -0.1966(13) 0.3346(13) 0.078(9) Uiso 0.50 d
PD . O3 O 0.2235(14) -0.1715(11) 0.3589(10) 0.083(6) Uiso 0.50 d PD .
C19 C 0.2833(20) -0.2651(13) 0.3402(13) 0.070(8) Uiso 0.50 d PD . C20
C 0.3337(15) -0.1579(11) 0.2976(10) 0.048(6) Uiso 0.50 d PD .

loop_
 _atom_site_aniso_label
 _atom_site_aniso_U_11
 _atom_site_aniso_U_22
 _atom_site_aniso_U_33
 _atom_site_aniso_U_23
 _atom_site_aniso_U_13
 _atom_site_aniso_U_12
Re 0.0205(3) 0.0291(2) 0.0458(3) 0.0026(2) 0.0011(2) 0.0062(2)
ReA 0.0159(2) 0.0259(2) 0.0425(2) -0.0003(2) -0.0002(2) 0.00223(14)
Cl1 0.0284(14) 0.0327(12) 0.0493(14) 0.0009(10) -0.0066(11) 0.0029(10)
Cl2 0.0195(13) 0.0357(13) 0.059(2) 0.0016(11) 0.0029(11) 0.0048(10)
Cl2A 0.0278(13) 0.0275(11) 0.0454(14) -0.0059(10) -0.0012(10)
0.0057(10) Cl1A 0.0174(13) 0.0321(12) 0.0501(14) -0.0012(10)
0.0042(10) -0.0003(9) O1 0.024(4) 0.029(4) 0.049(4) -0.002(3) 0.010(3)
-0.006(3) O2 0.055(6) 0.030(4) 0.052(4) 0.008(3) 0.000(4) 0.012(4) O2A
0.017(4) 0.029(3) 0.049(4) 0.001(3) 0.002(3) 0.003(3) N1 0.034(6)
0.025(4) 0.043(5) 0.005(3) 0.007(4) 0.009(4) N2 0.025(5) 0.038(5)
0.043(5) 0.005(4) 0.008(4) 0.012(4) N3 0.030(6) 0.046(5) 0.046(5)
0.003(4) 0.010(4) 0.004(4) N1A 0.021(5) 0.028(4) 0.046(5) 0.005(4)
-0.002(4) -0.001(3) N2A 0.032(6) 0.030(4) 0.049(5) -0.002(4) 0.008(4)
0.000(4) N3A 0.024(5) 0.043(5) 0.046(5) -0.002(4) 0.006(4) 0.006(4) C1
0.036(7) 0.018(5) 0.048(6) 0.002(4) 0.007(5) 0.006(4) C2 0.042(7)
0.027(5) 0.056(7) 0.001(5) 0.012(5) -0.007(5) C3 0.059(9) 0.025(5)
0.054(7) -0.006(5) 0.017(6) -0.009(5) C4 0.030(7) 0.030(5) 0.054(6)
0.005(5) 0.015(5) 0.001(5) C5 0.030(6) 0.026(5) 0.060(7) 0.003(5)
0.015(5) -0.005(4) C6 0.022(6) 0.054(7) 0.047(6) 0.005(5) 0.001(5)
-0.006(5) C7 0.043(7) 0.051(7) 0.039(6) -0.010(5) 0.004(5) -0.009(5)
C8 0.041(7) 0.025(5) 0.044(6) 0.002(4) 0.014(5) -0.009(5) C9 0.085(12)
0.036(7) 0.078(9) -0.006(6) 0.040(8) 0.004(7) C10 0.089(13) 0.030(6)
0.097(11) 0.004(6) 0.044(9) 0.002(7) C11 0.057(10) 0.054(8) 0.083(10)
0.007(7) 0.033(8) -0.014(7) C12 0.055(9) 0.060(8) 0.054(7) -0.010(6)
0.020(6) -0.026(6) C13 0.028(7) 0.085(9) 0.057(7) 0.000(7) 0.011(6)
0.023(6) C14 0.069(12) 0.050(8) 0.117(13) 0.006(8) 0.028(10) 0.011(7)
C15 0.110(17) 0.072(10) 0.140(16) -0.025(11) 0.070(13) -0.052(11) C16
0.037(8) 0.049(7) 0.070(8) -0.006(6) 0.001(6) -0.009(5) C17 0.042(8)
0.028(5) 0.079(8) 0.007(5) 0.027(6) 0.009(5) C1A 0.028(6) 0.025(5)
0.046(6) -0.003(4) 0.000(5) 0.003(4) C2A 0.024(6) 0.025(5) 0.051(6)
0.005(4) 0.005(5) -0.007(4) C3A 0.023(6) 0.027(5) 0.059(7) 0.001(4)
0.007(5) 0.004(4) C4A 0.015(5) 0.028(5) 0.054(6) 0.006(4) -0.005(4)
0.007(4) C5A 0.019(6) 0.033(5) 0.043(6) 0.008(4) 0.004(4) 0.007(4) C6A
0.040(7) 0.034(5) 0.044(6) 0.007(5) 0.022(5) 0.007(5) C7A 0.037(7)
0.036(6) 0.049(6) -0.001(5) 0.001(5) -0.004(5) C8A 0.025(6) 0.034(5)
0.037(5) -0.007(4) -0.001(4) -0.004(4) C9A 0.057(9) 0.039(6) 0.035(6)
0.000(4) 0.001(5) 0.003(5) C10A 0.047(8) 0.041(6) 0.046(6) 0.002(5)
0.001(5) 0.000(5) C11A 0.057(9) 0.047(7) 0.043(6) -0.005(5) -0.006(6)
-0.006(6) C12A 0.069(10) 0.042(7) 0.045(7) 0.000(5) 0.009(6) -0.001(6)
C13A 0.043(8) 0.044(6) 0.070(8) -0.006(6) 0.027(6) 0.011(5) C14A
0.048(8) 0.057(8) 0.064(8) 0.003(6) -0.019(6) -0.007(6) C15A 0.101(14)
0.071(9) 0.051(8) -0.017(7) -0.020(8) 0.007(9) C16A 0.036(7) 0.052(7)
0.055(7) 0.003(5) 0.007(5) -0.017(5) C17A 0.019(6) 0.053(7) 0.062(7)
0.015(6) -0.005(5) -0.009(5)

_geom_special_details
;
 All esds (except the esd in the dihedral angle between two l.s.
 planes) are estimated using the full covariance matrix.  The cell
 esds are taken into account individually in the estimation of esds in
 distances, angles and torsion angles; correlations between esds in
 cell parameters are only used when they are defined by crystal
 symmetry.  An approximate (isotropic) treatment of cell esds is used
 for estimating esds involving l.s. planes.
;

loop_
 _geom_bond_atom_site_label_1
 _geom_bond_atom_site_label_2
 _geom_bond_distance
 _geom_bond_site_symmetry_2
 _geom_bond_publ_flag
Re O2 1.669(7) . ?
Re O1 1.899(7) . ?
Re N2 2.100(9) . ?
Re N1 2.164(9) . ?
Re Cl1 2.376(3) . ?
Re Cl2 2.399(3) . ?
ReA O2A 1.683(7) . ?
ReA O1 1.923(7) . ?
ReA N2A 2.131(8) . ?
ReA N1A 2.135(8) . ?
ReA Cl2A 2.366(2) . ?
ReA Cl1A 2.376(2) . ?
N1 C1 1.330(15) . ?
N1 C5 1.362(14) . ?
N2 C6 1.332(14) . ?
N2 C8 1.403(13) . ?
N3 C6 1.304(14) . ?
N3 C7 1.355(14) . ?
N3 C13 1.472(14) . ?
N1A C1A 1.338(13) . ?
N1A C5A 1.338(13) . ?
N2A C6A 1.321(15) . ?
N2A C8A 1.375(13) . ?
N3A C6A 1.329(14) . ?
N3A C7A 1.37(2) . ?
N3A C13A 1.476(14) . ?
C1 C2 1.364(15) . ?
C2 C3 1.39(2) . ?
C2 C16 1.48(2) . ?
C3 C4 1.38(2) . ?
C4 C5 1.360(15) . ?
C4 C17 1.50(2) . ?
C7 C8 1.37(2) . ?
C7 C12 1.39(2) . ?
C8 C9 1.38(2) . ?
C9 C10 1.39(2) . ?
C10 C11 1.39(2) . ?
C10 C14 1.48(2) . ?
C11 C12 1.35(2) . ?
C11 C15 1.55(2) . ?
C1A C2A 1.368(15) . ?
C2A C3A 1.37(2) . ?
C2A C16A 1.520(15) . ?
C3A C4A 1.386(14) . ?
C4A C5A 1.384(15) . ?
C4A C17A 1.492(15) . ?
C7A C8A 1.39(2) . ?
C7A C12A 1.41(2) . ?
C8A C9A 1.36(2) . ?
